# Supplementary material
Source: MDPI journal article supplement (https://www.mdpi.com/2072-4292/15/22/5394)
Supplement: s1 [file s1 › remotesensing-2640733-supplementary.pdf]

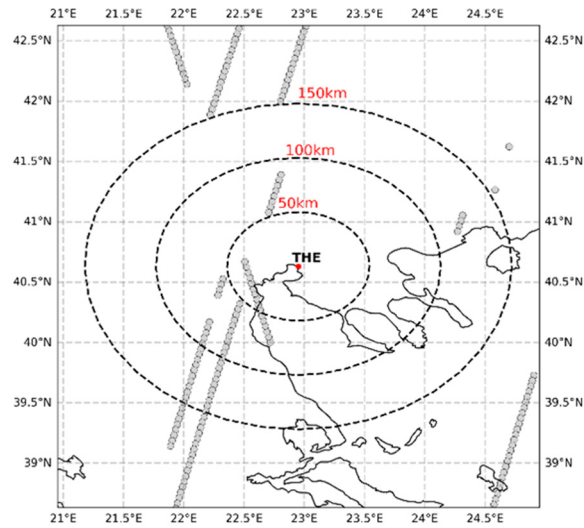

**Figure S1.** CALIPSO tracks with stratospheric layers classified as sulfates from July to September 2019. The concentric black dashed circles denote regions of 50, 100, 150km from the location of THELISYS.

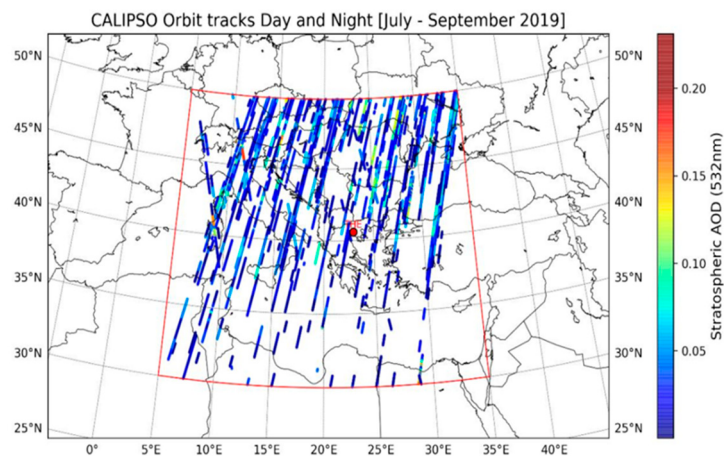

**Figure S2.** CALIPSO observations of the stratospheric AOD (at 532 nm) between 1 July and 20 September 2019 during day and night-time CALIPSO overpasses. The red dot corresponds to the location of THELISYS.

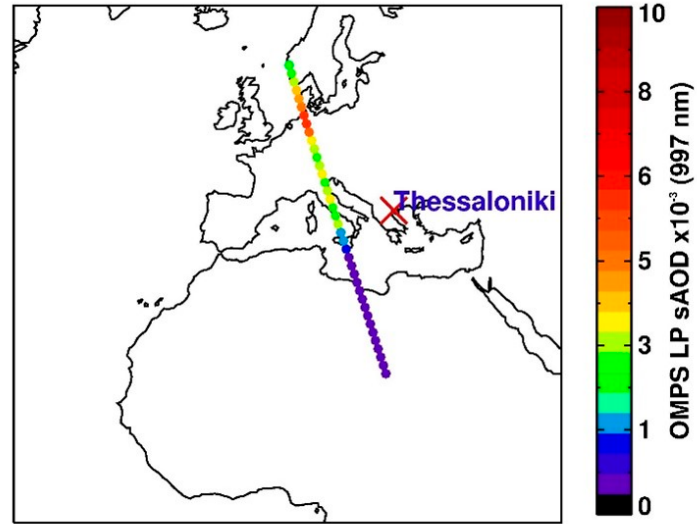

**Figure S3.** OMPS LP orbital track colored by the stratospheric aerosol optical depth (sAOD)  $\times 10^{-3}$  at 997 nm measured on 25 July 2019 near Thessaloniki. The red cross denotes the location of Thessaloniki.

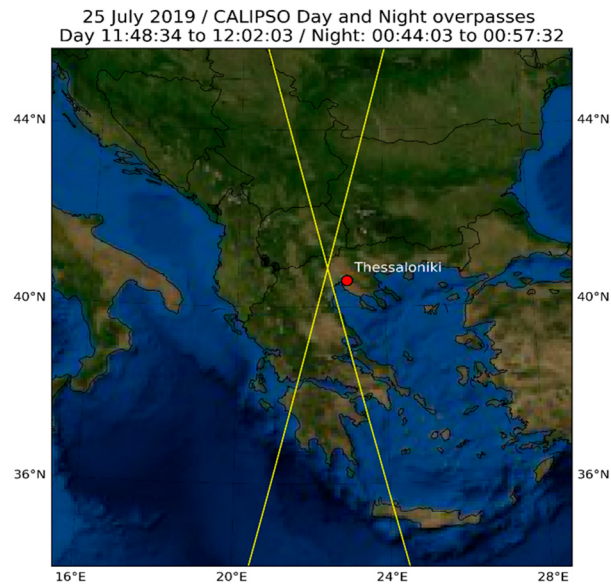

**Figure S4.** CALIPSO orbits during day and night over the domain under study on 25 July 2019. The red dot indicates the location of the THELISYS ground-based lidar.
